# Supplementary material for: Response of hydrology and CO 2 flux to experimentally-altered rainfall frequency in a temperate poor fen, southern Ontario, Canada
Source: Copernicus journal article supplement (doi:10.5194/bg-2017-485), 2017-12-05
Supplement: Supplementary file [file bg-2017-485-AC2-supplement.pdf]

# Response of hydrology and CO<sub>2</sub> flux to experimentally-altered rainfall frequency in a temperate poor fen, southern Ontario, Canada

Danielle D. Radu<sup>1</sup>, Tim P. Duval<sup>1</sup>

<sup>1</sup>Department of Geography, University of Toronto Mississauga, Mississauga, ON, Canada, L5L 1C6

5 Correspondence to: Tim P. Duval (tim.duval@utoronto.ca)

**Abstract.** Predicted changes to the precipitation regime in many parts of the world include intensifying the distribution into lower frequency, large magnitude events. The corresponding alterations to the soil moisture regime may affect plant growth and soil respiration, particularly in peatlands, where large stores of organic carbon are due to gross ecosystem productivity (GEP) exceeding ecosystem respiration (ER). This study uses a ~~combined-lab~~ monoliths corroborated with ~~and-field~~ approach   
10 measurements to examine the effect of changing rainfall frequency on peatland moisture controls on CO<sub>2</sub> uptake in an undisturbed cool temperate poor fen. Lab monoliths and field plots containing mosses, sedges, or shrubs received either 2.3, 1, or 0.5 events per week, with total rainfall held constant. Decreasing rain frequency led to lower near-surface volumetric moisture content (VMC), water table (WT), and soil tension for all vegetation types, with minimal effect on evapotranspiration. The presence of sedges in particular led to soil tensions > -100 cm of water of a sizeable duration (37 %) of the experiment.   
15 Altered rainfall frequencies affected GEP but had little effect on ER: overall low-frequency rain led to reduced net CO<sub>2</sub> uptake for all three vegetation types. VMC had a strong control on GEP and net ecosystem exchange (NEE) of the *Sphagnum capillifolium* monoliths, and decreasing rainfall frequency influenced these relationships. Overall, communities dominated by mosses became net sources of CO<sub>2</sub> after three days without rain, whereas sedge communities remained net sinks for up to 14 days without rain. Results of this study demonstrate the hydrological controls of peatland CO<sub>2</sub> exchange dynamics influenced   
20 by changing precipitation frequency and suggest these predicted changes in frequency will lead to increased ~~vascular~~ plant ~~sedge GEP but growth and~~ limit the carbon-sink function of peatlands.

## 1 Introduction

Northern peatlands cover less than 3% of the Earth's land surface but have sequestered approximately one-third of the global store of terrestrial carbon (Gorham, 1991; Yu, 2012), serving an important role in the global carbon cycle (Roulet et al., 2007;   
25 Limpens et al., 2008). However, this accumulated carbon is expected to be severely affected by climate change due to changes in temperature and precipitation patterns (Kettles and Tarnocai, 1999; Li et al., 2007; Gallego-Sala and Prentice, 2013). The net uptake of carbon in peatlands is due to relatively cool and moist conditions that promote slower release of CO<sub>2</sub> by ecosystem respiration (ER) than uptake by gross ecosystem productivity (GEP) (Frolking et al., 2002; Rydin and Jeglum, 2006; Frolking et al., 2010). Maintenance of the carbon sink function of peatlands is dependent on a high water table (WT) to minimize

30 respiration (Alm et al., 1999; Strack et al., 2006; Riutta et al., 2007) and high near-surface soil moisture to enable high rates of *Sphagnum* moss photosynthesis (Waddington and Roulet, 2000; Moore et al., 2002; Adkinson and Humphreys, 2011), both of which are controlled by the precipitation regime. Changing climate and weather patterns are leading to an intensification of the precipitation regime (Easterling et al., 2000; Cao and Ma, 2009; Diffenbaugh and Field, 2013), with increasingly-longer periods without rain that threaten the sink function of northern peatlands (Nijp et al., 2017).

35 Climate projections for boreal and temperate regions of the northern hemisphere suggest larger but less frequent precipitation events, with limited to no increases in absolute seasonal and annual precipitation (Trenberth, 2011; IPCC, 2013; Sillmann et al., 2013; Wang et al., 2014; Westra et al., 2014). This repackaging of the precipitation regime, especially during the growing seasons, is expected to lead to decreases in near-surface soil moisture, increased soil moisture variability, and deeper WT (Knapp et al., 2002; Gerten et al., 2008; Vervoort and van der Zee, 2008; Wu et al., 2012). Lower WT and near-surface soil  
40 moisture due to seasonal drought or temperature-induced increased ET have been shown to lead to reduced net carbon uptake and/or greater rates of CO<sub>2</sub> emission from peatlands (Carroll and Crill, 1997; Alm et al., 1999; Tuittila et al., 2004; Strack et al., 2006; Riutta et al., 2007). Additionally, changes to peatland hydrology through drought have led to changes in vegetation biomass and community composition, which in turn can alter peatland CO<sub>2</sub> exchange depending on the photosynthesis to respiration ratio of the newly established communities (Buttler et al., 2015; Potvin et al., 2015; Churchill et al., 2015; Dieleman  
45 et al., 2015). However, these experimental and monitoring studies typically reduce total precipitation input during the study period, while much less research has focussed on redistribution of rainfall whilst maintaining precipitation totals.

Most studies examining the impact of precipitation frequency on ecosystems have focussed on grassland systems (Hoover et al., 2014; Knapp et al., 2015; Wilcox et al., 2015; Didiano et al., 2016), with comparatively fewer studies in wetland environments. Riparian marsh species' biomass accumulation is negatively affected by month-long periods without added  
50 precipitation (Garssen et al., 2014). In peatland systems, shifts in rainfall frequency have been shown to affect net primary production from *Sphagnum* moss (Robroek et al., 2009; Nijp et al., 2014) and methane emission (Radu and Duval, 2017). *Sphagnum* moss photosynthesis in particular responds quickly to trace amounts of precipitation input (Strack and Price, 2009; Adkinson and Humphries, 2011); however, precipitation inputs are only available to these peat-building species for 2-3 days before it is evaporated (Ketcheson and Price, 2014). In the absence of precipitation, *Sphagnum* depends on capillary rise from  
55 the saturated zone to the photosynthesizing capitula (Clymo and Hayward, 1982). When WTs are too low and precipitation is absent, soil water tensions increase and hyaline cells drain, causing desiccation and reduced photosynthesis (Thompson and Waddington, 2008; Strack et al., 2009; McCarter and Price, 2014).

In addition to the non-vascular *Sphagna* species, peatlands can be dominated by shrub and graminoid plant functional types, primarily ericaceous shrubs and sedges, respectively (Rydin and Jeglum, 2006). Vascular plants photosynthesize as long as  
60 the component cells retain turgor pressure, and are less susceptible to periods of low precipitation and WT drawdowns (Malmer et al., 1994; Vile et al., 2011). Peatland shrubs typically have increased productivity when WTs are lowered (Weltzin et al.,

2001, Murphy et al., 2009, Bragazza et al., 2013; Munir et al., 2015) due to their shallow rooting system (Wallén, 1986). Sedges have deep roots (40-100 cm below peat surface) aided by aerenchyma that transport oxygen to lower depths (Silvan et al., 2004) and are thus tolerant of high WT conditions, but have also been documented to perform well under low WT conditions (Fenner et al., 2007; Dieleman et al., 2015). Additionally, plant and soil respiration rates differ between moss, sedge, and shrub communities (Chimner, 2004; Juszczak et al., 2012; Duval and Radu, 2017). Since vascular plants can comprise a significant portion of peatland productivity and respiration (Szumigalski and Bayley, 1996; Moore et al., 2002; Riutta et al. 2007; Korrensalo et al., 2017), their responses to climate change in concert with *Sphagnum* must be taken into account when assessing peatland carbon cycling.

70 Previous studies of the effect of lowered water table on different plant functional types to study the impacts of climate change on peatland carbon cycling have not included the importance of precipitation frequency (Riutta et al., 2007; Churchill et al., 2015; Potvin et al., 2015). Recent research on the interaction between peatland WT position hydrology, carbon cycling, and precipitation frequency has focussed on *Sphagnum* moss in lab and/or modelling studies (Nijp et al., 2014; Nijp et al., 2015; Nijp et al., 2017). We have recently extended on this research by showing the impact of rainfall frequency on vascular plant growth and seasonal CO<sub>2</sub> balance for moss, sedge, and shrub communities at a cool temperate poor fen in southern Ontario (Radu and Duval, 2018). However, natural variability and logistical constraints in the field prevented us from a formal assessment of the hydrological controls on the observed differences in NEE. There exists a research gap at the intersection of precipitation frequency and its effect on peatland hydrology and carbon cycling for a variety of peatland community types. Therefore, the objectives of this study are to i) investigate the effect of changing precipitation frequency on peatland hydrology, comprising including WT position, volumetric moisture content VMC, soil water tension, and evapotranspiration (ET), in three common peatland vegetation communities – *Sphagnum* moss only, Sedge with *Sphagnum*, and *Sphagnum* with ericaceous shrubs; and ii) determine the relationship between hydrologic conditions under the different rainfall frequency treatments and GEP, ER, and net ecosystem CO<sub>2</sub> exchange of those communities. We altered precipitation frequency without changing total precipitation amount in both *in situ* field plots and lab monoliths through commensurate changes to event magnitude.

Formatted: Subscript

Formatted: Subscript

## 2 Methods

### 2.1 Study Site

The study was carried out on peat monoliths collected from an undisturbed poor fen in southern Ontario, Canada (44°15'13.34" N, 80°20'46.83" W). Vegetation was dominated by *Sphagnum* moss (particularly *S. capillifolium* but also *S. rubellum*, *S. fuscum*, and *S. magellanicum*), sedges (*Carex oligosperma* and *Eriophorum vaginatum*) and shrubs (mostly *Chamaedaphne calyculata*, as well as *Rhododendron groenlandicum* and *Vaccinium uliginosum*). Moss ground cover is near 100 % throughout the site, except in areas with mature shrubs, where ground cover averaged 15 %. Average peat depth in the

sample area is 2.1 m overlaying a sandy silt till substrate (Burwasser, 1974). The climate near the site is characterised by a mean annual temperature of 6.4 °C and a mean annual precipitation of 996 mm (1981-2010 normal at Ruskview, ON station, data available: [http://climate.weather.gc.ca/climate\\_normals/](http://climate.weather.gc.ca/climate_normals/)). Rainfall events > 0.2 mm occurs on 43 % of the days during the early May – end of September growing season at this climate station. Over the growing season of 2015 at this site we manipulated rainfall frequency whilst holding total seasonal rain constant utilizing rainout shelters over areas dominated by moss, sedge, and shrub communities. We measured plant community changes and CO<sub>2</sub> exchange in response to these manipulated rainfall regimes at this site. Details of this field setup and experiment can be found in Radu and Duval (2018). Here we focus on the hydrological process-controls on the effect of rainfall frequency on CO<sub>2</sub> dynamics through an experiment under controlled laboratory conditions. We also analysed the field data in the same manner as the lab study.

Formatted: Subscript

Formatted: Subscript

## 2.2 Field Experiment

We examined the effect of rain frequency on peatland hydrology and CO<sub>2</sub> exchange among different vegetation communities in the field with the use of rainout shelters. The rainout shelters were built to 3 m X 3 m the previous summer to our study distributed among the three most common occurring plant communities in the peatland: 1) *Sphagnum* moss (mainly *S. capillifolium*) (“Moss” plots) 2) *Sphagnum* with sedges (mainly *Carex oligosperma*) (“Sedge” plots), and 3) ericaceous shrubs (mainly *Chamaedaphne calyculata*) with minimal *Sphagnum* ground cover (“Shrub” plots). We covered the shelters with new 6-mil transparent polyethylene sheeting immediately prior to our field campaign to exclude and collect natural rainwater to be used for our treatments. The 9 plots within each community were assigned one of three rain frequency treatments, replicated three times: 3 events/week, 1 event/week, and 1 event/2 weeks, hereafter referred to as “High-Frequency” (HiFreq), “Medium-Frequency” (MedFreq), and “Low-Frequency” (LowFreq), respectively. Although the frequency of the rain events was different, the total amount of water in each 2-week period was equal between treatments. Further details on the site setup can be found in Radu and Duval (2017) and Radu and Duval (submitted).

CO<sub>2</sub> fluxes were determined using the dynamic closed chamber method (Alm et al., 1999). Net ecosystem exchange (NEE) was measured using a 60-cm X 60-cm X 30-cm clear Plexiglass chamber with attached fan placed over permanent, ridge aluminum collars sealed with water, and an EGM 4 infrared gas analyzer (IRGA) (PP-Systems, Massachusetts, USA). Photosynthetically active radiation (PAR) and air temperature in the chamber were measured with a QSO-S PAR Photon Flux sensor (Apogee Instruments, Utah, USA) and the IRGA, respectively. Plots were sampled at least weekly throughout the study period (at midday (1000–1700 h) in both full sunlight and cloudy conditions throughout the season. Ecosystem respiration (ER) was measured using the same technique using an opaque aluminum chamber. Gross ecosystem productivity (GEP) was

calculated by subtracting ER from NEE. We used the convention that negative numbers denote ecosystem CO<sub>2</sub> uptake and positive numbers denote ecosystem CO<sub>2</sub> loss to the atmosphere.

Perforated PVC wells covered with 250-µm Nitex mesh were inserted into the ground to a depth of 1 m within each sample plot to monitor the WT level. EC-5 sensors (Decagon Devices Inc., Washington, USA) were carefully inserted vertically into the peat for a composite depth of 0-5 cm within sample plots receiving each rain treatment in each of the vegetation communities (VMC).

### 2.3 Lab Experimental Setup

Intact peat cores (30 cm diameter X 40 cm height) were collected from the peatland to investigate how precipitation frequency affects CO<sub>2</sub> exchange under controlled climate and WT regimes. Details of core collection and setup can be found in Radu and Duval (2017). Briefly, cores of each of the three vegetation communities were placed in an environment-controlled chamber (FXC-19 Chamber, BioChambers, Winnipeg, Manitoba, Canada) and water tables were kept at -5 cm for an acclimatization period to the chamber conditions. Climate conditions of the chamber can be found in Table S1.

We manipulated rainfall frequency over a four-month study period. Three precipitation frequency treatments were randomly assigned to monoliths of each vegetation community type: 3 events/week ('HiFreq-Lab'), 1 event/week ('MedFreq-Lab'), and 1 event/2 weeks ('LowFreq-Lab'). Simulated rainwater was a diluted Rudolph nutrient solution (Rudolph et al., 1988; Faubert and Rochefort, 2002) to limit detrimental effects to *Sphagnum* moss growth (Dieleman et al., 2015). The amount of water added for the individual events was adjusted such that the total amount of water was the same between treatments for each two-week period (see Table S2 for treatment details). At the beginning of the study period, all water levels were set to -5 cm ('High') and after two months were adjusted to -15 cm ('Low'). Within each of these two 2-month periods, WT positions were allowed to naturally fluctuate with the addition of rainwater and the loss of water through ET to simulate field conditions.

Perforated PVC wells (1.27 cm diameter) covered with 250-µm Nitex mesh were carefully inserted into peat cores to monitor WT levels; measurements were made three times weekly in all monoliths. VMC was measured with EC-5 soil moisture sensors installed vertically into the peat of each monolith for an integrated-composite depth of 0-5 cm; data were measured at half-hourly intervals with EM50 data loggers. Soil water tension was measured using 15-cm elbow tensiometers (Soil Measurement Systems, Arizona, USA) installed horizontally at 5 cm below moss surface; an SMS-INFIELD 7 portable tensiometer (UMS AG, Munich, Germany) was used for to measure tension 3 times per week. Actual evapotranspiration (ET) was measured directly by weighing the monoliths before and after rainwater solution additions throughout the study period.

CO<sub>2</sub> exchange was measured three times per week in the environmental chamber as above, though under constant atmospheric conditions (Table S1). CO<sub>2</sub> fluxes were measured using a clear Plexiglas cylindrical chamber (30 cm diameter X 40 cm height). A fan was mounted on the inside of the chamber to mix the air and homogenize the CO<sub>2</sub> concentration during measurements.

NEE was measured by fitting the clear chamber to a monolith and sealed with petroleum jelly to ensure an air-tight seal. The chamber was connected to an EGM-4 IRGA. All monoliths were measured sequentially. Following the NEE measurements, Ecosystem respiration (ER) was measured with an opaque aluminum cover placed over each the-chamber to exclude PAR. Temperatures inside the clear and opaque chambers were monitored during measurements and never found to increase by more than 1.5 °C. Gross ecosystem productivity (GEP) was calculated by subtracting ER from NEE.

## 2.4 Data Analysis

The data were checked for homogeneity and normality with Levene's test and Shapiro-Wilk's test, respectively. Differences in hydrological and CO<sub>2</sub> exchange parameters between rainfall frequency treatments and vegetation communities were assessed with ANOVA. Post-hoc pairwise comparisons of the mean responses to different treatments were assessed with Tukey tests. Relationships between hydrological variables and CO<sub>2</sub> exchange components were examined with linear and nonlinear regression. All statistical analyses were performed using the Statistica 8 software package (StatSoft Inc.).

## 3 Results

### 3.1 Peatland hydrology under changing rainfall frequency

~~Our rainout shelters in the field were able to significantly change the incident precipitation between our three rainfall treatments, with the HiFreq treatment being similar to the ambient rainfall regime during the study periods (Table S2). These changes to incident rain affected the near-surface volumetric soil moisture but had limited effect on WT fluctuation. Seasonal VMC was significantly higher in the HiFreq treatment than the LowFreq treatment for the Moss and Shrub vegetation communities ( $p < 0.001$ ; Table 1). Conversely, average VMC was lowest in the HiFreq treatments of the Sedge plots ( $p < 0.01$ ). Moreover, VMC in the field was more variable as rainfall frequency decreased, with ranges of ~24, 27, and 32 % for HiFreq, MedFreq, and LowFreq plots, respectively. On the other hand, WT fluctuation under the rainout shelters was heavily influenced by WT levels in the surrounding peatland. Shrub WT did not differ between rainfall treatments, while the HiFreq treatment WT was significantly lower than the two lower frequency treatments in both the Moss ( $p < 0.05$ ) and Sedge ( $p < 0.001$ ) communities (Table 1), which mimicked the pattern found outside the shelters in the areas selected for the HiFreq treatments. Thus, our efforts to restrict lateral flow from outside the shelters to our study areas had limited success.~~

~~In the lab peat monolith experiment, D~~Decreasing precipitation frequency generally resulted in decreased WT depth, near-surface VMC, and soil tension for all vegetation types, regardless of initial WT position (Table 12). Water table fluctuation between rainfall treatments for the different vegetation monoliths are shown in Figure S1. During the high WT period of the experiment, WT depths were significantly lower in the LowFreq-Lab relative to the HighFreq-Lab treatment in all vegetation communities ( $p < 0.001$ ; Table 12). In the second phase of the experiment when WTs were reset to -15 cm the WT was

**Commented [TD1]:** We will redo the stats using the mixed effects modelling approach suggested by reviewer #2.

180 significantly lower in the LowFreq-Lab relative to the HiFreq-Lab treatments in the Sedge + Moss ( $p < 0.01$ ) and Moss ( $p < 0.05$ ) monoliths, but not different in the Moss + Shrub communities.

Near-surface VMC followed the same pattern of WT fluctuation between rainfall treatments throughout the experiment for all vegetation monoliths (Fig. S2). For all vegetation types VMC was  $> 60\%$  in the HiFreq-Lab monoliths for more than half the experiment (Fig. 1). In comparison, the 50<sup>th</sup> quantile of VMC in the LowFreq-Lab treatment was much lower at 49, 51, and 52  
185 % for the Moss, Sedge + Moss, and Moss + Shrub, respectively (Fig. 1). Overall, VMC was significantly higher in the HiFreq-Lab than the LowFreq-Lab treatment for the Moss and Moss + Shrub monoliths for both portions of the experiment ( $p < 0.001$ ; Table 12). In the Sedge + Moss monoliths there were no significant differences in VMC between treatments under the high WT period ( $p = 0.298$ ), but during the low WT period VMC in the LowFreq-Lab treatment was significantly lower than either of the more-frequent treatments ( $p < 0.005$ ). Similar trends were found during the field experiment (Table S3). There was a significant relationship between VMC and WT for all vegetation communities in the lab study ( $R^2 = 0.77-0.93$ ,  $p < 0.0001$ ;  
190 Fig. 2S3), with proportionally greater decreases in VMC for a given WT drawdown for low- versus high-frequency treatments for all vegetation types. Additionally, there were differences in the proportional decrease in VMC for a unit decrease in WT between rain treatments for all vegetation types. VMC decreased by 0.1-0.2 % more in the LowFreq-Lab relative to the HighFreq-Lab treatment per cm drop in the WT in all vegetation communities.

195 Increasing the duration since the last precipitation event led to significant decreases in VMC for all vegetation communities (Fig. 23). The number of consecutive dry days had a greater effect on VMC declines during the high-WT phase of the experiment for both the Moss and Moss + Shrub monoliths. The VMC rate of decline decreased in the Moss monoliths by 50 % between the two phases of the experiment, from 1.6 %  $d^{-1}$  during the high-WT period ( $R^2 = 0.40$ ;  $p < 0.001$ ) to 0.8%  $d^{-1}$  ( $R^2 = 0.19$ ;  $p < 0.001$ ) during the low-WT phase (Fig. 23a). The decrease in rate of VMC decline was ~31 % between high-  
200 and low-WT portions of the experiment for the Moss + Shrub monoliths (Fig. 23c). In contrast the rate of VMC decline with increasing consecutive dry days increased slightly in the Sedge + Moss monoliths as the WT was lowered, from 1.6 %  $d^{-1}$  during the high phase ( $R^2 = 0.25$ ;  $p < 0.001$ ) to 1.8%  $d^{-1}$  during the low-WT phase ( $R^2 = 0.27$ ;  $p < 0.001$ ; Fig. 23b).

Average near-surface soil tension increased (became more negative) with decreasing rain frequency in all vegetation treatments (Table 12). These tensions rarely reached -100 cm, the critical level for *Sphagnum* capillary water supply, except in the Sedge  
205 + Moss monoliths subject to the LowFreq-Lab treatment during the low-WT period, where soil tension frequently was -150 cm. The monoliths experienced linear increases in tension of ~ -1.1, -1.8 and -1.4 cm  $d^{-1}$  of no rainfall under high WT levels for Mosses ( $R^2 = 0.28$ ;  $p < 0.001$ ), Sedge + Moss ( $R^2 = 0.22$ ;  $p < 0.001$ ), and Moss + Sedge ( $R^2 = 0.36$ ;  $p < 0.001$ ), respectively (Fig. 34). These rates of tension increase generally remained the same in the low-WT portion of the experiment for the Moss and Moss + Shrub monoliths (Fig. 34a,c). On the other hand, soil tension increased at a rate of -4.3 cm  $d^{-1}$  without rain in the  
210 Sedge + Moss monoliths during the low-WT phase, more than double the rate under high WT (Fig. 34b).

Sedge + Moss evapotranspiration (ET) was significantly higher under HiFreq-Lab and LowFreq-Lab than MedFreq-Lab treatments during both the high- and low-WT phases of the lab experiment ( $p < 0.05$ ; Table 12). There were no significant differences in ET in the Moss and Moss + Shrub monoliths. There was no clear trend between ET and the number of days since rainfall; however, ET exceeded  $3.5 \text{ mm d}^{-1}$  for up to two days after rainfall in all vegetation communities, and generally remained below  $3 \text{ mm d}^{-1}$  for periods up to 14 days without rain.

### 3.2 CO<sub>2</sub> exchange dynamics

Figure 45 illustrates demonstrates the rainfall treatments affected CO<sub>2</sub> exchange in all three vegetation communities. Gross ecosystem productivity from the Moss monoliths decreased with decreasing rainfall frequency under low-WT, with rates nearly twice as high in the HiFreq-Lab treatment ( $-0.101 \pm 0.010 \text{ mg CO}_2 \text{ m}^{-2} \text{ s}^{-1}$ ) compared to the LowFreq-Lab treatment ( $-0.056 \pm 0.014 \text{ mg CO}_2 \text{ m}^{-2} \text{ s}^{-1}$ ;  $p = 0.017$ ; Fig. 45a). While there were no differences in Moss ER between rainfall treatments during high WT the LowFreq-Lab treatment led to significantly more respiration during the low-WT period than either higher-frequency treatments ( $p = 0.004$ ). Moss NEE significantly decreased (less CO<sub>2</sub> uptake/more CO<sub>2</sub> release) with decreasing precipitation frequency in both WT treatments. Under the high-WT period, Moss monoliths were net CO<sub>2</sub> sinks, with NEE 3.5-times lower in the LowFreq-Lab ( $-0.010 \pm 0.008 \text{ mg CO}_2 \text{ m}^{-2} \text{ s}^{-1}$ ) relative to the HiFreq-Lab treatment ( $-0.038 \pm 0.006 \text{ mg CO}_2 \text{ m}^{-2} \text{ s}^{-1}$ ;  $p = 0.013$ ). During the low WT treatment, the Mosses switched to net CO<sub>2</sub> sources, with the LowFreq-Lab treatment emitting between three- and four-times more CO<sub>2</sub> ( $0.123 \pm 0.016 \text{ mg CO}_2 \text{ m}^{-2} \text{ s}^{-1}$ ) than the Med- ( $0.040 \pm 0.007 \text{ mg CO}_2 \text{ m}^{-2} \text{ s}^{-1}$ ) and HiFreq-Lab ( $0.031 \pm 0.004 \text{ mg CO}_2 \text{ m}^{-2} \text{ s}^{-1}$ ) treatments ( $p < 0.001$ ; Fig. 45a).

The presence of shrubs with the moss increased GEP in the LowFreq-Lab treatment during the low-WT phase, such that there were no differences in GEP due to rainfall treatment at this time (Fig. 45b). Additionally, during high WT the MedFreq-Lab treatment for the Moss + Shrub monoliths led to more CO<sub>2</sub> uptake than the LowFreq-Lab treatment. There were no differences in ER between vegetation treatments for either portion of the experiment for the Moss + Shrub monoliths. The pattern of NEE in response to rainfall frequency for Moss + Shrub monoliths was similar that observed with Moss – under high WT all three treatments were CO<sub>2</sub> sinks, with a shift to sources under low WT (Fig. 45b). While there were no differences in rates of NEE between frequency treatments under high WT ( $p = 0.412$ ), under low WT the MedFreq-Lab ( $0.042 \pm 0.007 \text{ mg CO}_2 \text{ m}^{-2} \text{ s}^{-1}$ ) and LowFreq-Lab ( $0.07 \pm 0.011 \text{ mg CO}_2 \text{ m}^{-2} \text{ s}^{-1}$ ) were nearly six- and 10-times greater sources of CO<sub>2</sub> than the HiFreq-Lab treatment ( $0.007 \pm 0.008 \text{ mg CO}_2 \text{ m}^{-2} \text{ s}^{-1}$ ;  $p = 0.019$ ).

There was a trend of greater CO<sub>2</sub> uptake with decreasing rainfall frequency under high WT in the Sedge + Moss monoliths, with LowFreq-Lab resulting in greater GEP ( $-0.155 \pm 0.008 \text{ mg CO}_2 \text{ m}^{-2} \text{ s}^{-1}$ ) than HiFreq-Lab ( $-0.098 \pm 0.002 \text{ mg CO}_2 \text{ m}^{-2} \text{ s}^{-1}$ ;  $p = 0.03$ ; Fig. 54c). Under low WT, GEP more than doubled in the HiFreq-Lab treatment to  $-0.214 \pm 0.012 \text{ mg CO}_2 \text{ m}^{-2} \text{ s}^{-1}$ , which was significantly higher than the MedFreq-Lab treatment ( $-0.146 \pm 0.007 \text{ mg CO}_2 \text{ m}^{-2} \text{ s}^{-1}$ ;  $p = 0.002$ ). While there were no significant differences in ER for the two WT levels, the relative rank order of the three rainfall frequency treatments remained



the same as for GEP. Overall, under high WT there was no effect of rain frequency on NEE for the Sedge + Moss monoliths; however, under low WT there was significantly greater NEE (*more carbon uptake*) during frequent rain ( $-0.045 \pm 0.012 \text{ mg CO}_2 \text{ m}^{-2} \text{ s}^{-1}$ ;  $p = 0.002$ ) as compared to MedFreq-Lab ( $0.008 \pm 0.007 \text{ mg CO}_2 \text{ m}^{-2} \text{ s}^{-1}$ ) and LowFreq-Lab ( $-0.009 \pm 0.012 \text{ mg CO}_2 \text{ m}^{-2} \text{ s}^{-1}$ ), both of which were not statistically different from zero (Fig. 45c).

### 3.3 Controls on CO<sub>2</sub> exchange between rainfall frequency treatments

~~There was a clear difference in the ratio of GEP between LowFreq and HiFreq treatments across the range of PAR values measured in the field (Fig. 6). The Low:High Frequency GEP ratio was < 1.0 for over two-thirds of the Moss GEP measurements, and was only > 1.5 when PAR was < 800  $\mu\text{mol m}^{-2} \text{ s}^{-1}$ . In contrast, GEP in the LowFreq treatment exceeded the HiFreq measurements at equal PAR for 75 % of the Shrub measurements, with ratios > 2.0 a common occurrence under high light conditions (PAR > 800  $\mu\text{mol m}^{-2} \text{ s}^{-1}$ ). There was no trend to the ratio of GEP between low and high frequency treatments in the Sedge communities, with values between 0.5 and 1.5 across all light levels (Fig. 6).~~

There were significant unimodal relationships between Moss GEP and VMC from the monoliths, and these relationships varied between the rain frequency treatments (Fig. 57a). The relationship was strongest for the high frequency rain treatments, with peak rates of GEP occurring at 65 % VMC. The strength of the relationship decreased with decreasing rain frequency, as did the VMC at which peak GEP occurred. There were no significant relationships between GEP and WT. The position of the WT was highly correlated with Moss ER for all of the rain frequency treatments ( $p < 0.001$ ; Fig. 57b). As rain frequency decreased, WT declines led to proportionally greater rates of ER, with the rate of increase in LowFreq-Lab ER being 1.5-times higher than the HiFreq-Lab treatment (Fig. 57b). Moss NEE was strongly controlled by near-surface VMC, with significant quadratic correlations for the HiFreq-Lab and MedFreq-Lab treatments, and a third-order polynomial relationship for the LowFreq-Lab rainfall treatment (Fig. 57c). The switch from net CO<sub>2</sub> uptake to a net source occurred in the Moss monoliths at VMC of 60, 62, and 64 % in the HiFreq-Lab, MedFreq-Lab, and LowFreq-Lab, respectively. VMC was below these levels for 49 % of the study in the HiFreq-Lab treatment, 66 % in the MedFreq-Lab, and 73 % in the LowFreq-Lab treatment (Fig. 1). Similar relationships between moss carbon flux and peatland hydrology between rain frequency treatments were found in the field experiment (Fig. S35); however, positive NEE occurred at higher VMC, which occurred for much less of the study period (20 % in the LowFreq treatment).

Under the HiFreq-Lab treatment VMC had a unimodal control on rates of GEP from the Sedge + Moss monoliths, with peak gross production occurring at a VMC of 49 % (Fig. 68a). Decreasing rain frequency rendered this relationship insignificant. Ecosystem respiration was influenced by WT position in the Sedge + Moss monoliths, with rates increasing between 57 and 71 % faster with WT drawdown in the LowFreq-Lab and MedFreq-Lab, respectively, than for the HiFreq-Lab conditions (Fig. 68b). There were moderate but highly significant ( $p < 0.001$ ) linear correlations between WT and Sedge + Moss NEE for the lower-frequency treatments, ~~and~~-a quadratic relationship existed between NEE and WT in the HiFreq-Lab treatment, ~~with~~

~~minimum rates of net CO<sub>2</sub> uptake occurring when the WT was at -29 cm~~ (Fig. 68c). The trends with the Moss + Shrub monoliths were similar to the Moss-only monoliths (data not shown). There were no significant relationships between WT or VMC with GEP or NEE from the Shrub communities in the field, though WT did control ER in these communities ( $p < 0.001$ ).

Overall, increasing the number of days since the last rainfall event led to a strong increase in NEE (CO<sub>2</sub> efflux to the atmosphere) for the Moss monoliths ( $R^2 = 0.31$ ,  $p < 0.01$ ), a moderate increase for the Moss + Shrub monoliths ( $R^2 = 0.18$ ,  $p < 0.001$ ), but almost no increase in the Sedge + Moss monoliths ( $R^2 = 0.05$ ,  $p = 0.044$ ; Fig. 79). This relationship was linear for the vascular plant communities, and quadratic for the moss-only monoliths. The Moss and Moss + Shrub monoliths had a net uptake of CO<sub>2</sub> when the duration since the last event was under 3.5 days; however, after this threshold, there was net emission of CO<sub>2</sub>. On the other hand, Sedge + Moss monoliths were largely sinks of CO<sub>2</sub> for up to 2 weeks without rainfall, and were predicted to have a net emission of CO<sub>2</sub> after 15 days between events.

## 4 Discussion

### 4.1 Plant community-mediated response of peat hydrology to precipitation frequency

It is expected that a shift in the precipitation to larger, more infrequent events will lead to lower WT levels and drier surface conditions (Knapp et al., 2008; Piao et al., 2009). We found that decreasing precipitation frequency while holding total seasonal rain constant resulted in lower average WT positions, lower VMC, and higher soil tension in all vegetation communities (Tables 1, S32; Fig. S1, S2). The smaller, more frequent precipitation events were able to buffer against seasonal WT declines and maintain more moisture in the near-surface peat layer (Fig. S32). On the other hand, the larger, less frequent events contributed moisture to deeper layers, which led to the observed increased rates of VMC decline with concomitant WT decline (Fig. S32). Therefore, in addition to climate change leading to increased ET and lower WT positions in peatlands (Whittington and Price, 2006; Munir et al., 2015), the frequency of rainfall events is likely to contribute to even drier surface conditions than is currently considered.

—Decreasing rainfall frequency allowed for continued near-surface soil moisture decreases (Fig. 23) and tension increases (Fig. 34). Delivering rain every three days, the current average for the studied peatland site (Table S2), prevented these large soil moisture declines in communities dominated by *Sphagnum* moss (Table S34; Fig. S2). On the other hand, the presence of sedges increased ET relative to the moss-only communities. Vascular plant abundance increases peatland ET, even during periods of limited rainfall (Takagi et al., 1999; Petrone et al., 2004; Admiral and Lafleur, 2007; Wu et al., 2013; Takashi et al., 2016). During the first portion of the experiment when WTs were high, the rate of drying was the same between Moss and Sedge + Moss monoliths; however, during the low-WT portion the rate of drying in the sedge community became 75 % higher than in the moss-only community (Fig. 23a, b). This led to over a four-fold greater rate of tension increase in the presence of sedges (Fig. 34a, b). The low-frequency rain treatment in the Sedge + Moss community led to near-surface tensions

Formatted: Font: Italic

< -100 cm, sometimes after only four days without rain. This tension threshold is generally considered the point at which *Sphagnum* can no longer effectively photosynthesize (Price, 1997, Thompson and Waddington, 2008).

Formatted: Font: Italic

305 ———In our study -100 cm of tension was reached at a VMC of 37 %, similar to thresholds found in other peatlands (Price and Whitehead, 2004; Cagampan and Waddington, 2008). The high- and medium-frequency treatments for all vegetation communities maintained soil moisture above this value for at least 92 % of the experiment; however, deviations below this threshold increased considerably in the low-frequency rain treatment (Fig. 1). The Moss and Moss + Shrub monoliths subject to Low-Frequency rain experienced moss-level VMC < 37 % for ~10 % of the experiment, whereas the Sedge + Moss  
310 monoliths were below this threshold for 38 % of the experiment. Overall, our results suggest that the interaction between deeper WT and less-frequent precipitation regimes expected with climate change will lead to high tensions that may limit moisture uptake by *Sphagnum* mosses in peatlands dominated by sedges.

#### 4.2 Precipitation frequency – peatland hydrology interactive effects on CO<sub>2</sub> exchange

The precipitation regimes we imposed affected the CO<sub>2</sub> exchange of the vegetation communities. Overall, decreasing rainfall  
315 frequency led to decreased NEE (less storage / greater flux to the atmosphere) from the peatland communities tested, with differences in NEE for four of the six vegetation-WT combinations we tested (Fig. 45). Nijp et al. (2014) also found NEE decreased from three *Sphagnum* species as precipitation frequency decreased. Field measurements of CO<sub>2</sub> fluxes from peatlands have also documented decreased GEP and increased ER during extended rainless periods, switching peatlands to net sources of CO<sub>2</sub> during these short periods (Alm et al., 1999; Lund et al., 2012). Seasonal estimates from our study site confirm  
320 increased flux of CO<sub>2</sub> to the atmosphere from moss communities during low-frequency rain; however, the abundant shrub communities we were able to test in the field ~~showed higher seasonal NEE (less source to the atmosphere)reduced losses to the atmosphere~~ under low-frequency rain, due to higher GEP from the mature shrubs (Radu and Duval, 2018submitted).

Lower WTs characteristic of drought periods ~~can decrease productivity from Sphagnum-dominated peatlands through reduced VMC creating a moisture stress (Alm et al., 1999; Chivers et al., 2009; Potvin et al., 2015), as well as increase aerobic respiration through increased oxygen diffusion and a greater depth of aerated soil (Carroll and Crill, 1997; Tuittila et al., 2004)and increase respiration,~~ resulting in overall net loss of carbon to the atmosphere, ~~from Sphagnum-dominated peatlands (Carroll and Crill, 1997; Alm et al., 1999; Tuittila et al., 2004; Chivers et al., 2009; Potvin et al., 2015).~~ Our study demonstrates  
325 low WTs exacerbate the effect of low rain frequency through greater rates of ER, causing the Moss and Moss + Shrub communities to switch from net sinks of CO<sub>2</sub> to net sources (Fig. 45a, b). ~~The combination of low WT and low-frequency rain led to greater rates of near-surface drying (Fig. 2), which would stimulate soil respiration through increased aeration (Silvola et al., 1996).~~ Additionally, low WT resulted in the Sedge + Moss monoliths subject to the two lower frequency treatments to switch from sinks to becoming carbon neutral (Fig. 45c). The lack of NEE response to low WT from the Sedge + Moss  
330

community subject to frequent rain was due to increased GEP, presumably because the high frequency rain maintained moss photosynthesis, while the sedges increased production with lower WT (Wu et al., 2013; Potvin et al., 2015).

335 Carbon assimilation by *S. capillifolium* was sensitive to rainfall frequency-induced changes in VMC. As rainfall frequency decreased, peak GEP rates were lower and occurred at lower VMC, while the strength of the relationship between GEP and VMC weakened (Fig. 57). Repeated drying and wetting of mosses has been found to result in lower photosynthetic capacity due to damage to moss cellular integrity, including degradation of chlorophyll and rupture of cell membranes (Schipperges and Rydin, 1998). The low-frequency rain events allowed for greater near-surface VMC variability, which may have  
340 contributed to lower moss GEP at any given VMC. Gerdol et al. (1996) found *Sphagnum* species, including the dominant species in our study, *S. capillifolium*, were unable to resume photosynthesis after an 11-day period without new water. In our study, the mosses continued to photosynthesize, albeit at lower rates, after 13 days without rain, as soil water tensions were weak enough (> -100 cm) to allow water uptake. Mosses subject to a regime of six days between rainfall events had GEP rates 25% lower than under a regime of two days between events.

345 The observed increase in the VMC threshold at which the *Sphagnum capillifolium* monoliths switched from NEE sinks to sources as precipitation frequency decreased (Fig. 57a) was related to the concomitant lower WTs (Fig. S32a). Therefore, decreasing rain frequency not only lowered near-surface soil moisture but also created an additional stress for the mosses by reducing the availability of capillary water due to the lower WT. During the high-WT portion of the experiment VMC was found to drop below these thresholds after 10-11 days without rain; however, the low-WT period was characterized by near-  
350 surface VMC almost always less than 60 % (Fig. 23a). Strack et al. (2009) found a sink-source threshold for *S. rubellum* of ~45 % VMC in the near-surface peat, and Nijp et al. (2014) found a VMC of 48 % corresponded to a switch from sink to source for *S. balticum*. All three species are lawn- or small hummock-forming species capable of withstanding low water availability, yet differ greatly in their response to VMC. The physiological mechanisms driving this range in moisture content threshold to NEE among *Sphagna* species were beyond the scope of our study, but these differences in species-specific responses to soil water content are very important for parameterizing peatland ecosystem models (le Roux et al., 2013; Nijp et al., 2017).

In our study, moss-dominated communities became sources of CO<sub>2</sub> to the atmosphere after less than a week without rain (Fig. 79). This switch from carbon sink to source was primarily driven by decreased VMC between events limiting GEP (Fig. S2, 57a). The monoliths dominated by vascular plants were less affected by rainfall-induced decreases in VMC due to their deeper  
360 roots (Silvan et al., 2004), with the sedge communities maintaining uptake or carbon neutrality for the maximum 14 consecutive dry days of our experiment (Fig. 79). In our study region, southern Ontario, seven consecutive dry days occur quite regularly during the growing season, with one or two 14-day dry periods typical, and these dry periods are predicted to increase in both length and recurrence during growing seasons (Orlowsky and Seneviratne, 2012; Sillmann et al., 2013; Walsh et al., 2014).

#### 4.3 Implications for peatland plant productivity-functional types and climate change

365 Our study demonstrates that plant functional types will be differentially affected ~~vascular plants in peatlands will likely have~~  
370 ~~a competitive advantage over mosses~~ as rainfall becomes less frequent, particularly if accompanied by lower WT as a result  
of climate change. *Sphagnum*-only communities experienced a significant decrease in GEP with less frequent rainfall, while  
GEP in the communities with vascular plants was generally unaffected. Additionally, decreased precipitation frequency had  
stronger negative implications for *S. capillifolium* in the presence of sedges, with near-surface tensions > -100 cm after only 3  
375 days without rainfall when the WT was deep (>-15 cm). Although we did not measure *S. capillifolium* productivity separate  
from the Sedges in the same communities, white, desiccated *S. capillifolium* capitula were observed in Sedge + Moss monoliths  
receiving less frequent rainfall when the water table was low. In a companion study we found low frequency rain led to  
significantly more seasonal sedge and ericaceous shrub cover and GEP than high frequency rain (Radu and Duval,  
2018submitted). Ericaceous shrubs in particular seem to thrive, with rates of GEP under LowFreq exceeding HiFreq rates 75  
375 % of the time, generally at multiples of 2-7 under high light conditions (Fig. S46).

Our results show that decreased precipitation frequency will decrease net CO<sub>2</sub> uptake in peatland plant communities dominated  
by *Sphagnum*, both in the presence and absence of sedges and juvenile shrubs. With the lower water table positions expected  
as a result of increased ET, we showed that these communities may switch to CO<sub>2</sub> sources, and decreased precipitation  
frequency may increase net CO<sub>2</sub> release. Furthermore, increased shrub dominance (Hedwall et al., 2017) is likely to shift the  
380 CO<sub>2</sub> balance towards increased CO<sub>2</sub> efflux to the atmosphere. Therefore, we found that decreasing precipitation frequency is  
likely to lead to a positive feedback for climate change due to increased net CO<sub>2</sub> release to the atmosphere caused by drier  
surface conditions and a possible shift to sedge- and shrub-dominated communities.

Over the longer term, decreased precipitation frequency is likely to affect the net carbon sink function of temperate peatlands.  
The reduced NEE of the Sphagnum-dominated monoliths with decreasing precipitation frequency (Fig. 4) will progressively  
385 limit storage of carbon in the peat on the annual and decadal scales. We have recently shown that decreased growing season  
precipitation frequency increases sedge and shrub growth (Radu and Duval, 2018). The incorporation of vascular plant litter  
into the peat matrix should increase rates of respiration over and above the short-term results of the present study due to the  
greater rates of decomposition relative to Sphagnum peat (Leifeld et al., 2012; Dieleman et al., 2015; Duval and Radu, 2017).  
390 Predicted lower WT position as a consequence of global warming will result in lower long-term rates of carbon accumulation  
in peatlands (Strack et al., 2006; Peichl et al., 2014; Carlson et al., 2015). Therefore, the combined effects of lowered WT,  
increased vascular plant cover, and decreased VMC due to decreased precipitation frequency (Fig. 2) are likely to reduce long-  
term rates of carbon storage, potentially switching temperate peatlands to carbon sources.

#### 5 Conclusions

395 Our study has demonstrated that decreasing rainfall frequency results in lower average VMC, WT, and soil water tension, and  
increases their variability. In turn, these changes in peat hydrology led to changes in CO<sub>2</sub> exchange dynamics, with significant  
effects on GEP and NEE. Moss-dominated communities in particular were strongly affected by changes in rainfall frequency,  
with decreasing gross and net CO<sub>2</sub> uptake with decreasing rain frequency. In contrast, sedge-dominated communities were able  
to better withstand the longer periods without rain, and actually increased GEP with low-frequency rain when the WT was  
close to the surface. The empirical relationships between CO<sub>2</sub> exchange and near-surface VMC and WT showed clear  
400 differences between rainfall treatments, demonstrating the influence of rain frequency on these couplings. The presence of a  
low WT was found to have very strong effects on CO<sub>2</sub> exchange, shifting the Moss and Moss + Shrub communities from net  
CO<sub>2</sub> sinks to net sources while rendering the Sedge + Moss communities CO<sub>2</sub> neutral under the lower-frequency treatments.

We show the maintenance of near-surface moisture is very important to moss productivity, and as little as four consecutive  
dry days (CDD) was sufficient to illicit a net CO<sub>2</sub> efflux response from the moss monoliths. On the other hand, the deeper  
405 rooting system of the sedges prevented these monoliths from becoming sources for the extent of our experiment (14 CDD).  
Most climate change projections predict increases in the number and recurrence of CDD during the growing season for many  
peat-forming areas throughout the globe and our results suggest this will limit net CO<sub>2</sub> uptake in peatlands. We show the  
presence of a lower WT, as predicted due to rising temperatures, increases the effect of lowered precipitation frequency. These  
rainfall-induced moisture and CO<sub>2</sub> dynamics should be included in peatland ecosystem and climate models.

#### 410 **Code Availability**

N/A

#### **Data Availability**

Data are available from the corresponding author upon request

#### **Author contribution**

415 DDR and TPD developed the idea and methodology for the study, as well as led the experimental setup. DDR led the data  
acquisition. TPD and DDR performed the data analysis. Both authors wrote the manuscript.

#### **Competing Interests**

The authors declare that they do not have any conflicts of interest.

## Acknowledgements

420 We thank the entire Stream and Wetland Ecohydrology Research Group at UTM for their assistance with the field portion of this study. In particular, we thank Ana Banjavcic and Michael Harris for help with core collection and William Ng for lab analysis. This research was funded by NSERC Discovery Grant #418197 to TPD and a NSERC CGS-M and UTM-Graduate Expansion Fund to DDR.

## References

- 425 Adkinson, A. C. and Humphreys, E. R.: The response of carbon dioxide exchange to manipulations of *Sphagnum* water content in an ombrotrophic bog, *Ecohydrology*, 4, 733-743, doi:10.1002/eco.171, 2011.
- Admiral, S. W. and P. M. Lafleur.: Partitioning of latent heat flux at a northern peatland, *Aquatic Botany*, 86, 107–116, doi:10.1016/j.aquabot.2006.09.006, 2007.
- Alm, J., Schulman, L., Walden, J., Nykanen, H., Martikainen, P. J., and Silvola, J.: Carbon balance of a boreal bog within a year with an exceptionally dry summer, *Ecology*, 80(1), 161-174, doi:10.1890/0012-9658(1999)080[0161:CBOABB]2.0.CO;2, 1999.
- 430 Bragazza L., Parisod J., Buttler A., and Bardgett R. D.: Biogeochemical plant-soil microbe feedback in response to climate warming in peatlands, *Nature Climate Change*, 3, 273–277, doi:10.1038/NCLIMATE1781, 2013.
- Burwasser, C. J.: Quaternary geology of the collingwood-nottawasaga area, southern ontario; ontario div. mines, prelim. Map P. 919 Geol. Ser., scale 1:50,000, 1974.
- 435 Buttler, A., Robroek, B. J. M., Laggoun-Défarge, F., Jassey, V. E. J., Pochelon, C., Bernard, G., Delarue, F., Gogo, S., Mariotte, P., Mitchell, E. A. D., and Bragazza, L.: Experimental warming interacts with soil moisture to discriminate plant responses in an ombrotrophic peatland, *Journal of Vegetation Science*, 26, 964-974, doi:10.1111/jvs.12296, 2015.
- Cagampan J. P. and Waddington, J. M.: Moisture dynamics and hydrophysical properties of a transplanted acrotelm on a cutover peatland. *Hydrological Processes*, 22, 1776–1787, doi:10.1002/hyp.6802, 2008.
- 440 Cao, Z. and Ma, J.: Summer severe-rainfall frequency trend and variability over Ontario, Canada. *Journal of Applied Meteorology and Climatology*, 48, 1955-1960, doi:10.1175/2009JAMC2055.1, 2009.
- [Carlson, K.M., Goodman, L.K., and May-Tobin, C.C.: Modeling relationships between water table depth and peat soil carbon loss in Southeast Asian plantations, \*Environmental Research Letters\*, 10\(7\), 074006, doi:10.1088/1748-9326/10/7/074006, 2015.](#)
- 445

Carroll, P. and Crill, P.: Carbon balance of a temperate poor fen, *Global Biogeochemical Cycles*, 11(3), 349-356, doi:10.1029/97GB01365, 1997.

Chimner, R. A.: Soil respiration rates of tropical peatlands in Micronesia and Hawaii, *Wetlands*, 24, 51-56, doi.org/10.1672/0277-512(2004)024[0051:SRROTP]2.0.CO;2, 2004.

450 Chivers, M. R., Turetsky, M. R., Waddington, J. M., Harden, J. W., and McGuire, A. D.: Effects of experimental water table and temperature manipulations on ecosystem CO<sub>2</sub> fluxes in an Alaskan rich fen, *Ecosystems*, 12, 1329-1342, doi:10.1007/s10021-09-9292-y, 2009.

Churchill, A. C., Turetsky, M. R., McGuire, A. D., and Hollingsworth, T. N.: Response of plant community structure and primary productivity to experimental drought and flooding in an Alaskan fen, *Canadian Journal of Forest Research*, 45, 185-193, doi:10.1139/cjfr-2014-0100, 2015.

455 Clymo, R. S. and Hayward, P. M.: The ecology of *Sphagnum*, *Bryophyte Ecology*, Smith, A. J. E. (ed). Chapman & Hall: New York; 229-289, 1982.

Didiano, T. J., Johnson, M. T. J., and Duval, T. P.: Disentangling the effects of precipitation amount and frequency on the performance of 14 grassland species, *PLoS One*, 11, #e0162310, doi:10.1371/journal.pone.0162310, 2016.

460 Dieleman, C. M., Branfireun, B. A., McLaughlin, J. W., and Lindo, Z.: Climate change drives a shift in peatland ecosystem plant community: Implications for ecosystem function and stability, *Global Change Biology*, 21(1), 388-395, doi:10.1111/gcb.12643, 2015.

Diffenbaugh, N. S. and Field, C. B.: Changes in ecologically critical terrestrial climate conditions, *Science*, 341, 486-492, doi:10.1126/science.1237123, 2013.

465 Duval, T. P. and Radu, D. D.: Effect of temperature and soil organic matter quality on greenhouse-gas production from temperate poor and rich fen soils, *Ecological Engineering*, doi:10.1016/j.ecoleng.2017.05.011, 2017.

Easterling, D. R., Meehl, G. A., Parmesan, C., Changnon, S. A., Karl, T. R., and Meams, L. O.: Climate extremes: Observations, modeling, and impacts, *Science*, 289, 2068-2074, doi:10.1126/science.289.5487.2068, 2000.

470 Faubert, P. and Rochefort, L.: Response of peatland mosses to burial by wind-dispersed peat, *The Bryologist*, 105, 96-103, doi:10.1639/0007-2745(2002)105[0096:ROPMTB]2.0.CO;2, 2002.

Fenner, N., Freeman, C., Lock, M. A., Harmens, H., Reynolds, B., and Sparks, T.: Interactions between elevated CO<sub>2</sub> and warming could amplify DOC exports from peatland catchments, *Environmental Science & Technology*, 41(9), 3146-3152, doi:10.1021/es061765v, 2007.

Formatted: Subscript



- 475 Frolking, S., Roulet, N. T., Moore, T. R., Lafleur, P. M., Bubier, J. L., and Crill, P. M.: Modeling seasonal to annual carbon  
balance of Mer Bleue Bog, Ontario, Canada, *Global Biogeochemical Cycles*, 16(3), 1030, doi:10.1029/2001GB001457,  
2002.
- Frolking, S., Roulet, N. T., Tuittila, E., Bubier, J. L., Quillet, A., Talbot, J., and Richard, P.J.H., A new model of Holocene  
peatland net primary production, decomposition, water balance, and peat accumulation, *Earth Systems Dynamics*,  
doi.org/10.5194/esd-1-1-2010, 2010.
- 480 Gallego-Sala, A.V. and Prentice, C.: Blanket peat biome endangered by climate change, *Nature Climate Change* 3(2), 152-  
155, doi:10.1038/NCLIMATE1672, 2013.
- Garssen, A. G., Verhoeven, J. T. A., and Soons, M. B.: Effects of climate-induced increases in summer drought on riparian  
plant species: a meta-analysis, *Freshwater Biology*, 59, 1052-1063, doi:10.1111/fwb.12328, 2014.
- 490 Gerdol, R., Bonora, A., Gualandri, R., and Pancaldi, S.: CO<sub>2</sub> exchange, photosynthetic pigment composition, and cell  
ultrastructure of Sphagnum mosses during dehydration and subsequent rehydration, *Canadian Journal of Botany*, 74, 726-  
734, 1996.
- Gerten, D., Luo, Y., LeMaire, G., Partons, W. J., Keoughs, C., Weng, G., Beier, C., Ciais, P., Cramer, W., Dukes, J. S.,  
Hanson, P. J., Knapp, A. A. K., Linder, S., Nepstad, D., Rustad, L., and Sowerby, A.: Modelled effects of precipitation on  
ecosystem carbon and water dynamics in different climatic zones, *Global Change Biology*, 14, 2365-2379,  
490 doi:10.1111/j.1365-2486.2008.01651.x, 2008.
- Gorham, E.: Northern peatlands: Role in the carbon cycle and probable responses to climatic warming, *Ecological  
Applications*, 1(2), 182-195, doi:10.2307/1941811, 1991.
- Hedwall, P.-O., Brunet, J., and Rydin, H.: Peatland plant communities under global change: negative feedback loops  
counteract shifts in species composition, *Ecology*, 98, 150-161, doi:10.1002/ecy.1627, 2017.
- 495 Hoover, D. L., Knapp, A. K., and Smith, M. D., Resistance and resilience of a grassland ecosystem to climate extremes,  
*Ecology*, 95, 2646-2656, doi:10.1890/13-2186.1, 2014.
- IPCC 2013. *Climate Change 2013: The Physical Science Basis*. In: Stocker, T.F., Qin, D., Plattner, G.-K., Tignor, M., Allen,  
S.K., Boschung, J., Nauels, A., Xia, Y., Bex, V., Midgley, P.M. (Eds), *Contribution of Working Group I to the Fifth  
Assessment Report of the Intergovernmental Panel on Climate Change*. Cambridge University Press, Cambridge, UK and  
500 New York, NY, USA. 1535pp.
- Juszcak, R., Humphreys, E., Manual, A., Michalak-Galczevska, M., Kayzer, D., and Olejnik, J.: Ecosystem respiration in a  
heterogeneous temperate peatland and its sensitivity to peat temperature and water table depth, *Plant and Soil*, 366(1-2),  
505-520, doi:10.1007/s11104-012-1441-y, 2012.

- 505 Ketcheson, S. J. and Price, J. S.: Characterization of the fluxes and stores of water within newly formed *Sphagnum* moss cushions and their environment, *Ecohydrology*, 7, 771-782, doi:10.1002/eco.1399, 2014.
- Kettles, I. M. and Tarnocai, C.: Development of a model for estimating the sensitivity of Canadian peatlands to climate warming, *Geographie physique et quaternaire*, 53(3), 323-338, 1999.
- Knapp, A. K., Fay, P. A., Blair, J. M., Collins, S. L., Smith, M. D., Carlisle, J. D., Harper, C. W., Danner, B. T., Lett, M. S., and McCarron, J. K.: Rainfall variability, carbon cycling, and plant species diversity in a mesic grassland, *Science*, 298, 2202–2205, doi:10.1126/science.1076347, 2002.
- 510 Knapp, A. K., Beier, C., Briske, D. D., Classen, A. T., Luo, Y., Reichstein, M., Smith, M. D., Smith, S. D., Bell, J. E., Fay, P. A., Heisler, J. L., Leavitt, S. W., Sherry, R., Smith, B., and Weng, E.: Consequences of more extreme precipitation regimes for terrestrial ecosystems, *BioScience*, 58(9), 811-821, doi:10.1641/B580908, 2008.
- Knapp, A. K., Hoover, D. L., Wilcox, K. R., Avolio, M. L., Koerner, S. E., La Pierre, K. J., Loik, M. E., Luo, Y. Q., Sala, O. E. and Smith, M. D., Characterizing differences in precipitation regimes of extreme wet and dry years: implications for climate change experiments, *Global Change Biology*, 21, 2624-2633, doi:10.1111/gcb.12888, 2015
- 515 Korrensalo, A., Alekseychik, P., Hájek, T., Rinne, J., Vesala, T., Mehtätalo, L., Mammarella, I., and Tuittila, E.- S.: Species-specific temporal variation in photosynthesis as a moderator of peatland carbon sequestration, *Biogeosciences*, 14, 257-269, doi:10.5194/bg-14-257-2017, 2017.
- 520 [Leifeld, J., Steffens, M., and Galego-Sala, A.: Sensitivity of peatland carbon loss to organic matter quality, \*Geophysical Research Letters\*, 39, L14704, doi:10.1029/2012gl051856, 2012.](#)
- le Roux, P. C., Aalto, J., and Luoto, M.: Soil moisture's underestimated role in climate change impact modelling in low-energy systems, *Global Change Biology*, 19, 2965-2975, doi:10.1111/gcb.12286, 2013.
- Li, W., Dickenson, R. E., Fu, R., Niu, G-Y., Yang, Z-L., and Canadell, J. G.: Future precipitation changes and their implications for tropical peatlands, *Geophysical Research Letters*, 34, L01403, doi:10.1029/2006GL028364, 2007.
- 525 Limpens, J., Berendse, F., Blodau, C., Canadell, J. G., Freeman, C., Holden, J., Roulet, N., Rydin, H., and Schaepman-Strub, G.: Peatlands and the carbon cycle: from local processes to global implications – a synthesis, *Biogeosciences*, 5, 1475-1491, doi.org/10.5194/bg-5-1475-2008, 2008.
- Lund, M., Christensen, T. R., Lindroth, A., and Schubert, P.: Effects of drought conditions on the carbon dioxide dynamics in a temperate peatland, *Environmental Research Letters*, 7(4), #045704, doi:10.1088/1748-9326/7/4/045704, 2012.
- 530 Malmer, N., Svensson, B., and Wallén, B.: Interactions between *Sphagnum* mosses and field layer vascular plants in the development of peat-forming systems, *Folia Geobotanica & Phytotaxonomica*, 29(4), 483-496, 1994.

- McCarter, C. P. R. and Price, J. S., Ecohydrology of *Sphagnum* moss hummocks: mechanisms of capitula water supply and simulate effects of evaporation, *Ecohydrology*, 7, 33-44, doi:10.1002/eco.1313, 2014.
- 535 Moore, T. R. and Dalva, M.: The influence of temperature and water table position on carbon dioxide and methane emissions from laboratory columns of peatland soils, *European Journal of Soil Science*, 44, 651-664, 1993.
- Moore, T. R., Bubier, J. L., Frohling, S. E., Lafleur, P. M., and Roulet, N. T.: Plant biomass and production and CO<sub>2</sub> exchange in an ombrotrophic bog, *Journal of Ecology*, 90(1), 25-36, doi:10.1046/j.0022-0477.2001.00633.x, 2002.
- Munir, T. M., Perkins, M., Kaing, E., and Strack, M.: Carbon dioxide flux and net primary production of a boreal treed bog: Responses to warming and water-table-lowering simulations of climate change, *Biogeosciences*, 12(4), 1091-1111, doi:10.5194/bg-12-1091-2015, 2015.
- 540 Murphy, M. T., McKinley, A., and Moore, T. R.: Variations in above- and below-ground vascular plant biomass and water table on a temperate ombrotrophic peatland, *Botany*, 87, 845-853, doi:10.1139/B09-052, 2009.
- Nijp, J. J., Limpens, J., Metselaar, K. M., van der Zee, S. E. A. T. M., Berendse, F., and Robroek, B. J. M.: Can frequent precipitation moderate the impact of drought on peatmoss carbon uptake in northern peatlands?, *New Phytologist*, 203(1), 70-80, doi:10.1111/nph.12792, 2014.
- [Nijp, J.J., Limpens, J., Metselaar, K., Peichl, M., Nilsson, M.B., van der Zee, S.E.A.T.M., and Berendse, F.: Rain events decrease boreal peatland net CO<sub>2</sub> uptake through reduced light availability, \*Global Change Biology\*, 21, 2309-2320, doi:10.1111/gcb.12864, 2015.](#)
- 550 Nijp, J. J., Metselaar, K., Limpens, J., Teutschbein, C., Peichl, M., Nilsson, M. B., Berendse, F., and van der Zee, S. E. A. T. M.: Including hydrological self-regulating processes in peatland models: Effects on peatmoss drought projections, *Science of the Total Environment*, 580, 1389-1400, doi:10.1016/j.scitotenv.2016.12.104, 2017.
- Orlowsky, B. and Seneviratne, S. I.: Global changes in extreme events: regional and seasonal dimension, *Climatic Change*, 110, 669-696, doi:10.1007/s10584-011-0122-9, 2012.
- 555 [Peichl, M., Oquist, M., Lofvenius, M.O., Ilstedt, U., Sagerfors, J., Grelle, A., Lindroth, A., and Nilsson, M.B.: A 12-year record reveals pre-growing season temperature and water table level threshold effects on the net carbon dioxide exchange in a boreal fen, \*Environmental Research Letters\*, 9, 055006, doi:10.1088/1748-9326/9/5/055006, 2014.](#)
- Petrone, R. M., Price, J. S., Waddington, J. M., and von Waldow, H.: Surface moisture and energy exchange from a restored peatland, Québec, Canada, *Journal of Hydrology*, 295, 198-210, doi:10.1016/j.jhydrol.2004.03.009, 2012.
- 560 Piao, S., Yin, L., Wang, X., Ciais, P., Peng, S., Shen, Z., and Seneviratne, S.I.: Summer soil moisture regulated by precipitation frequency in China, *Environmental Research Letters*, 4, 044012, doi:10.1088/1748-9326/4/4/044012, 2009.

Formatted: Subscript

- Potvin, L. R., Kane, E. S., Chimner, R. A., Kolka, R. K., and Lilleskov, E. A.: Effects of water table position and plant functional group on plant community, aboveground production, and peat properties in a peatland mesocosm experiment (PEATcosm), *Plant and Soil*, 387, 277–294, doi:10.1007/s11104-014-2301-8, 2015.
- 565 Price, J. S.: Soil moisture, water tension, and water table relationships in a managed cutover bog, *Journal of Hydrology*, 202(1-4), 21-32, doi:10.1016/S0022-1694(97)00037-1, 1997.
- Price, J. S. and Whitehead, G. S.: Developing hydrologic thresholds for *Sphagnum* recolonization on an abandoned cutover bog, *Wetlands*, 21(1), 32-40, doi:10.1672/0277-5212(2001)021[0032:DHTFSR]2.0.CO;2, 2001.
- Radu, D. D. and Duval, T. P.: Impact of rainfall regime on methane flux from a cool temperate fen depends on vegetation cover, *Ecological Engineering*, doi:10.1016/j.ecoleng.2017.06.047, 2017.
- 570 Radu, D. D. and Duval, T. P.: Precipitation frequency alters peatland ecosystem structure and CO<sub>2</sub> exchange: contrasting effects on moss, sedge, and shrub communities, ~~submitted to~~ *Global Change Biology*, doi: 10.1111/gcb.14057, 20187.
- Riutta, T., Laine, J., and Tuittila, E.-S.: Sensitivity of CO<sub>2</sub> exchange of fen ecosystem components to water level variation, *Ecosystems*, 10, 718-733, doi:10.1007/s10021-007-9046-7, 2007.
- 575 Robroek, B. J. M., Schouten, M. G. C., Limpens, J., Berendse, F., and Poorter, H.: Interactive effects of water table and precipitation on net CO<sub>2</sub> assimilation of three co-occurring *Sphagnum* mosses differing in distribution above the water table, *Global Change Biology*, 13, 397-411, doi:10.1111/j.1365-2486.2008.01724.x, 2009.
- Roulet, N. T., Lafleur, P. M., Richard, P. J. H., Moore, T. R., Humphreys, E. R., and Bubier, J.: Contemporary carbon balance and late Holocene carbon accumulation in a northern peatland, *Global Change Biology*, 13, 397-411, doi:10.1111/j.1365-2486.2006.01292.x, 2007.
- 580 Rudolph, H., Kirchhoff, M., and Gliessmann, S.: *Sphagnum* culture techniques, In J. M. Glime (ed.), *Methods in Bryology*, Proceedings of the Bryological Methods Workshop, Mainz. Hattori Botanical Laboratory, Nichinan, 25–34, 1988.
- Rydin, H. and Jeglum, J.: *The Biology of Peatlands*, Oxford University Press, Oxford, 2006.
- Schipperges, B. and Rydin, H. Response of photosynthesis of *Sphagnum* species from contrasting microhabitat to tissue water content and repeated desiccation, *New Phytologist*, 140, 677-684, doi:10.1046/j.1469-8137.1998.00311.x, 1998.
- 585 Sillmann, J., Kharin, V. V., Zwiers, F. W., Zhang, X., Bronaugh, D.: Climate extremes indices in the CMIP5 model ensemble: part 2: Future climate projections, *J. Geophys. Res.-Atmos*, 118, 2473-2493, doi:10.1002/jgrd.50188, 2013.
- Silvan, N., Tuittila, E.-S., Kitunen, V., Vasander, H., and Laine, J.: Nitrate uptake by *Eriophorum vaginatum* controls N<sub>2</sub>O production in a restored peatland, *Soil Biology and Biochemistry*, 37, 1519–1526, doi:10.1016/j.soilbio.2005.01.006, 2004.

Formatted: Subscript

- 590 [Silvola, J., Alm, J., Ahlholm, U., Nykanen, H., and Martikainen, P.J.: CO<sub>2</sub> fluxes from peat in boreal mires under varying temperature and moisture conditions, \*Journal of Ecology\*, 84, 219-228, 1996.](#)
- Strack, M., Waddington, J. M., Rochefort, L. and Tuittila, E.: Response of vegetation and net ecosystem carbon dioxide exchange at different peatland microforms following water table drawdown, *Journal of Geophysical Research: Biogeosciences*, 111(G2), #G02006, doi:10.1029/2005JG000145, 2006.
- 595 Strack, M. and Price, J. S.: Moisture controls on carbon dioxide dynamics of peat-*Sphagnum* monoliths, *Ecohydrology*, 2(1), 34-41, doi:10.1002/eco.36, 2009.
- Strack, M., Waddington, J. M., Lucchese, M. C., and Cagampan, J. P.: Moisture controls on CO<sub>2</sub> exchange in a *Sphagnum*-dominated peatland: results from an extreme drought field experiment, *Ecohydrology*, 2(4), 454-461, doi:10.1002/eco.68, 2009.
- 600 Strack, M., Keith, A. M., and Xu, B.: Growing season carbon dioxide and methane exchange at a restored peatland on the Western Boreal Plain, *Ecological Engineering*, 64, 231-239, doi:10.1016/j.ecoleng.2013.12.013, 2014.
- Szumigalski, A. R. and Bayley, S. E.: Net above-ground production along a bog-rich fen gradient in central Alberta, Canada. *Wetlands*, 16(4), 467-476, 1996.
- Takagi, K., Tsuboya, T., Takahashi, H., and Inoue, T.: Effect of the invasion of vascular plants on heat and water balance in the Sarobetsu mire, northern Japan, *Wetlands*, 19, 246-254, 1999.
- 605 Takashi, H., Hiroyuki, Y., Masayuki, T., Yoshiyasu, F., Hiroko, F., Hidenori, T.: Effects of the expansion of vascular plants in *Sphagnum*-dominated bog on evapotranspiration, *Agricultural and Forest Meteorology*, 220, 90-100, doi:10.1016/j.agrformet.2016.01.039, 2016.
- Thompson, D. K. and Waddington, J. M.: *Sphagnum* under pressure: towards an ecohydrological approach to examining
- 610 *Sphagnum* productivity, *Ecohydrology*, 1(4), 299-308, doi:10.1002/eco.31, 2008.
- Trenberth, K. E.: Changes in precipitation with climate change, *Climate Research*, 47(1-2), 123-138, doi:10.3354/cr00953, 2011.
- Tuittila, E.-S., Vasander, H., and Laine, J.: Sensitivity of C sequestration in reintroduced *Sphagnum* to water-level variation in a cutaway peatland, *Restoration Ecology*, 12(4), 483-493, doi:10.1111/j.1061-2971.2004.00280.x, 2004.
- 615 Vervoort, R. W. and van der Zee, S. E. A. T. M.: Simulating the effect of capillary flux on the soil water balance in a stochastic ecohydrological framework, *Water Resources Research*, 44, W08425, doi:10.1029/2008WR006889, 2008.
- Vile, M. M., Scott, K. D., Brault, E., Wieder, R. K., and Vitt, D. H.: Living on the edge: the effects of drought on Canada's western boreal peatlands, *In* Z. Tuba and N. G. Slack, (eds.), *Bryophyte Ecology and Climate Change*. Cambridge: Cambridge University Press, 277-297, 2011.

Formatted: Subscript

- 620 Waddington, J. M. and Roulet, N. T.: Carbon balance of a boreal patterned peatland, *Global Change Biology*, 6, 87-97, doi:10.1046/j.1365-2486.2000.00283.x, 2000.
- Walsh, J., Wuebbles, D., Hayhoe, K., Kossin, J., Kunkel, K., Stephens, G., Thorne, P., Vose, R., Wehner, M., Willis, J., Anderson, D., Kharin, V., Knutson, T., Landerer, F., Lenton, T., Kennedy, J., and Somerville, R.: Appendix 3: Climate Science Supplement. *Climate Change Impacts in the United States: The Third National Climate Assessment*, Melillo, J. M., Terese (T.C.) Richmond, and Yohe, G. W., Eds., U.S. Global Change Research Program, 735-78, 2014.
- 625 Wang, X., Huang, G., and Liu, J.: Projected increases in intensity and frequency of rainfall extremes through a regional climate modeling approach, *Journal of Geophysical Research: Atmospheres*, 119, 13271-13286, doi:10.1002/2014JD022564, 2014.
- Weltzin, J. F., Harth, C., Bridgman, S. D., Pastor, J., and Vonderharr, M.: Production and microtopography of bog bryophytes: response to warming and water-table manipulations, *Oecologia*, 128(4), 557-565, doi:10.1007/s004420100691, 2001.
- 630 Westra, S., Fowler, H. J., Evans, J. P., Alexander, L. V., Berg, P., Johnson, F., Kendon, E. J., Lenderink, G., and Roberts, N. M.: Future changes to the intensity and frequency of short-duration extreme rainfall, *Review of Geophysics*, 52(3), 522-555, doi:10.1002/2014RG000464, 2014.
- 635 Whittington, P. N. and Price, J. S.: The effects of water table draw-down (as a surrogate for climate change) on the hydrology of a fen peatland, Canada, *Hydrological Processes*, 20, 3589-3600, doi:10.1002/hyp.6376, 2006.
- Wilcox, K. R., von Fischer, J. C., Muscha, J. M., Petersen, M. K., and Knapp, A. K.: Contrasting above- and belowground sensitivity of three Great Plains grasslands to altered rainfall regimes, *Global Change Biology*, 21, 335-344, doi:10.1111/gcb.12673, 2015.
- 640 Wu, C., Chen, J. M., Pumpanen, J., Cescatti, A., Marcolla, B., Blanken, P. D., Ardö, J., Tang, Y., Magiulo, V., Georgiadis, T., Soegaard, H., Cook, D. R., and Harding, R. J.: An underestimated role of precipitation frequency in regulating summer soil moisture, *Environmental Research Letters*, 7(2), #024011, doi:10.1088/1748-9326/7/2/024011, 2012.
- Wu, J., Roulet, N. T., Sagerfors, J. and Nilsson, M. B.: Simulation of six years of carbon fluxes for a sedge-dominated oligotrophic minerogenic peatland in northern Sweden using the McGill Wetland model (MWM), *Journal of Geophysical Research: Biogeosciences*, 118(2), 795-807, doi:10.1002/jgrg.20045, 2013.
- 645 Yu, Z. C.: Northern peatland carbon stocks and dynamics: a review, *Biogeosciences*, 9(10), 4071-4085, doi:10.5194/bg-9-4071-2012, 2012.

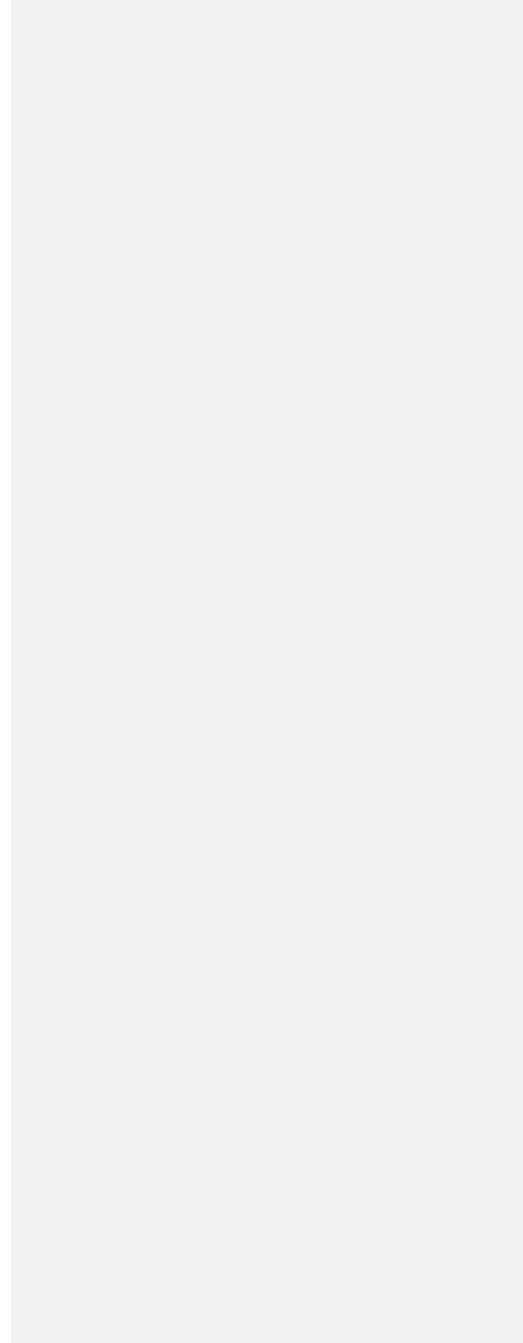

**Table 1:** Mean (standard deviation) values of hydrological variables for each precipitation treatment within each vegetation community during the field experiment (May-September 2015). Different letters indicate significant differences ( $p < 0.05$ ) between precipitation treatments within each water table and vegetation treatment. No letters indicate no significant differences.

| Vegetation Community | Rainfall Treatment | VMC (%) | WT (cm)  |
|----------------------|--------------------|---------|----------|
| Moss                 | HiFreq             | 75(6)a  | -17(6)a  |
|                      | MedFreq            | 75(7)a  | -12(6)b  |
|                      | LowFreq            | 71(8)b  | -13(6)ab |
| Shrub                | HiFreq             | 50(3)a  | -18(6)   |
|                      | MedFreq            | 26(3)b  | -18(6)   |
|                      | LowFreq            | 30(4)c  | -16(6)   |
| Sedge                | HiFreq             | 27(2)a  | -21(6)a  |
|                      | MedFreq            | 82(6)b  | -11(6)b  |
|                      | LowFreq            | 68(11)c | -13(6)b  |

**Table 2:** Mean (standard deviation) values of hydrological variables volumetric moisture content (VMC), water table (WT), soil matric tension ( $\psi$ ), and evapotranspiration (ET) for each precipitation, WT water table, and vegetation community treatment during the laboratory experiment. Different letters indicate significant differences ( $p < 0.05$ ) between precipitation treatments within each water table and vegetation treatment. No letters indicate no significant differences.

| Rainfall Treatment | VMC (%) | WT (cm)  | $\psi$ (cm) | ET (mm/d)       | VMC (%) | WT (cm) | $\psi$ (cm) | ET (mm/d) |
|--------------------|---------|----------|-------------|-----------------|---------|---------|-------------|-----------|
| High Water Table   |         |          |             | Low Water Table |         |         |             |           |
|                    |         |          |             | Moss            |         |         |             |           |
| HiFreq-Lab         | 74(8)a  | -6(1)a   | -18(8)ab    | 1.4(.07)        | 50(8)a  | -20(4)a | -25(5)a     | 1.5(0.2)  |
| MedFreq-Lab        | 71(6)ab | -7(2)a   | -16(7)a     | 1.3(.07)        | 47(6)ab | -20(4)a | -28(6)a     | 1.3(.07)  |
| LowFreq-Lab        | 65(8)b  | -11(3)b  | -23(9)b     | 1.5(0.1)        | 43(7)b  | -23(5)b | -32(9)b     | 1.4(.08)  |
|                    |         |          |             | Moss + Shrub    |         |         |             |           |
| HiFreq-Lab         | 77(8)a  | -8(2)a   | -14(7)a     | 1.4(0.2)        | 50(7)a  | -21(4)  | -30(12)     | 1.6(0.2)  |
| MedFreq-Lab        | 72(5)ab | -10(3)ab | -18(10)ab   | 1.5(.09)        | 46(8)ab | -22(4)  | -28(10)     | 1.4(0.1)  |
| LowFreq-Lab        | 68(5)b  | -12(3)b  | -21(10)b    | 1.6(0.1)        | 43(8)b  | -22(5)  | -33(14)     | 1.5(0.1)  |
|                    |         |          |             | Sedge + Moss    |         |         |             |           |
| HiFreq-Lab         | 67(8)   | -13(4)a  | -21(10)a    | 1.8(0.1)a       | 44(9)a  | -31(8)a | -41(11)a    | 1.9(0.2)  |
| MedFreq-Lab        | 69(10)  | -10(3)a  | -22(9)a     | 1.4(0.1)b       | 48(6)a  | -22(5)b | -29(5)a     | 1.3(0.3)  |
| LowFreq-Lab        | 64(10)  | -19(10)b | -33(15)b    | 2.0(0.1)a       | 37(10)b | -37(6)c | -71(38)b    | 1.8(0.2)  |



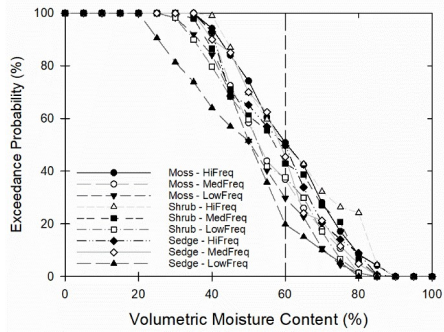

685

Figure 1: Exceedance probability of VMC from the peat monoliths subject to Hi-, Med-, and LowFreq-Lab precipitation frequency treatments.

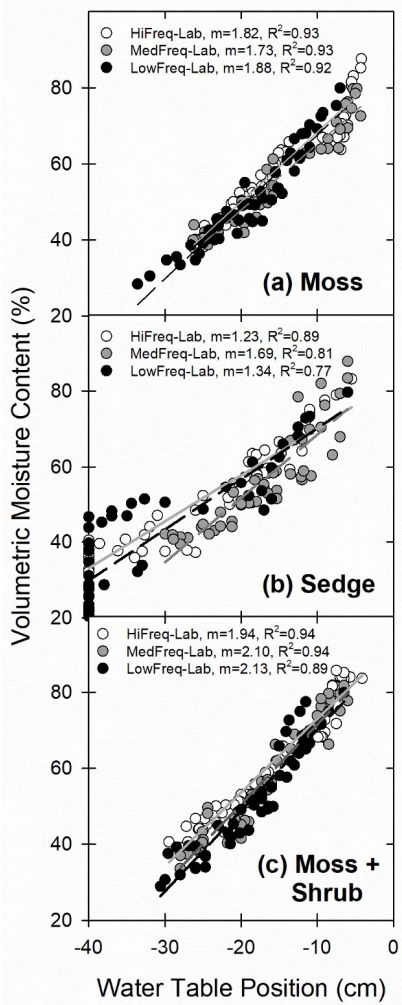

**Figure 2: Relationship between daily average VMC and WT depth for (a) Moss, (b) Sedge + Moss, and (c) Moss + Shrub communities. Slopes and correlation coefficients (R<sup>2</sup>) of the regressions for each precipitation treatment are shown. All correlations were significant (p < 0.001).**

690

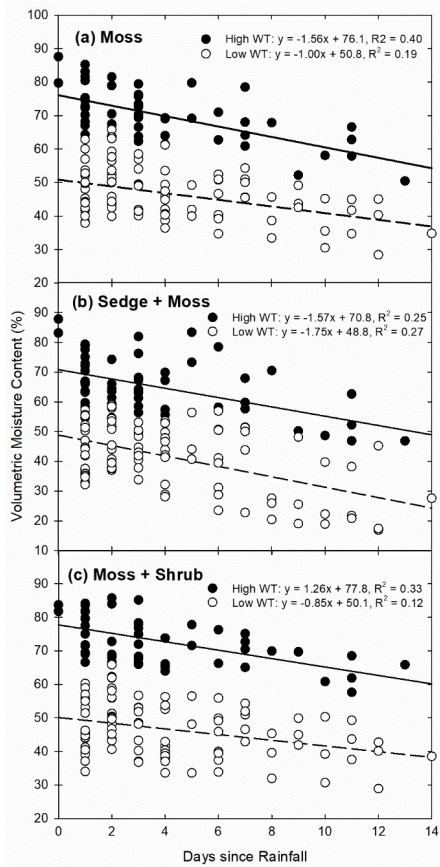

695

**Figure 23:** Relationship between daily average VMC and days since the last rainfall-irrigation event for (a) Moss, (b) Sedge + Moss, and (c) Moss + Shrub monoliths. Data for each vegetation type are separated between high-WT and low-WT portions of the experiment. Data are combined between precipitation frequency treatments. Linear regressions are provided. All regressions were significant ( $p < 0.05$ ).

700

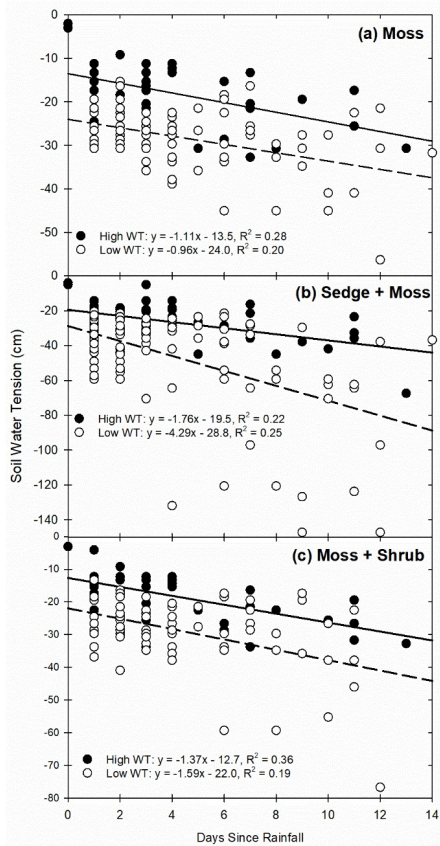

705 **Figure 34:** Relationship between daily soil water tension (cm of water) and days since the last rainfall-irrigation event for (a) Moss, (b) Sedge + Moss, and (c) Moss + Shrub monoliths. Data for each vegetation type are separated between high-WT and low-WT portions of the experiment. Data are combined between precipitation frequency treatments. Linear regressions are provided. All regressions were significant ( $p < 0.05$ ).

710

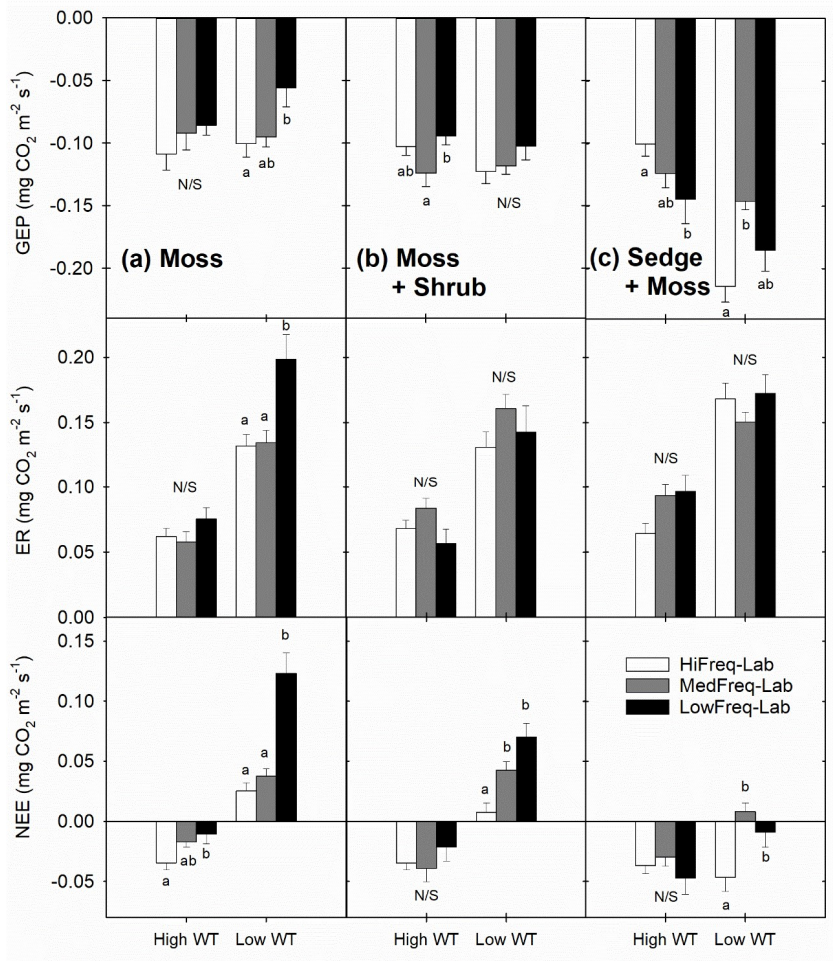

**Figure 45:** Comparison of mean GEP, ER, and NEE between rainfall treatments within each WT treatment for each vegetation community: a) Moss, b) Moss + Shrub, and c) Sedge + Moss. Error bars represent the standard error of the mean. Negative NEE represents net CO<sub>2</sub> uptake. Different letters indicate significant differences ( $p < 0.05$ ) between treatments within each WT period.

715

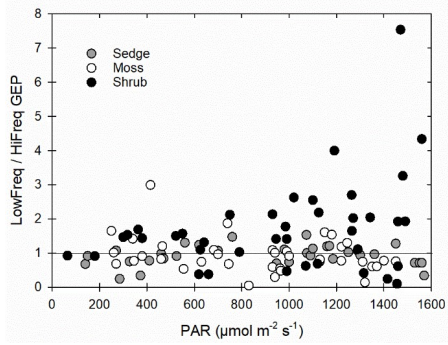

720 **Figure 6: Ratios of GEP of plots receiving the low-frequency treatment to plots receiving the high-frequency treatment at the same PAR values. Different symbols indicate measurements taken in the Moss, Sedge, and Shrub vegetation communities at the field site during May-September 2015. The horizontal line indicates equal GEP between frequency treatments at the given PAR value.**

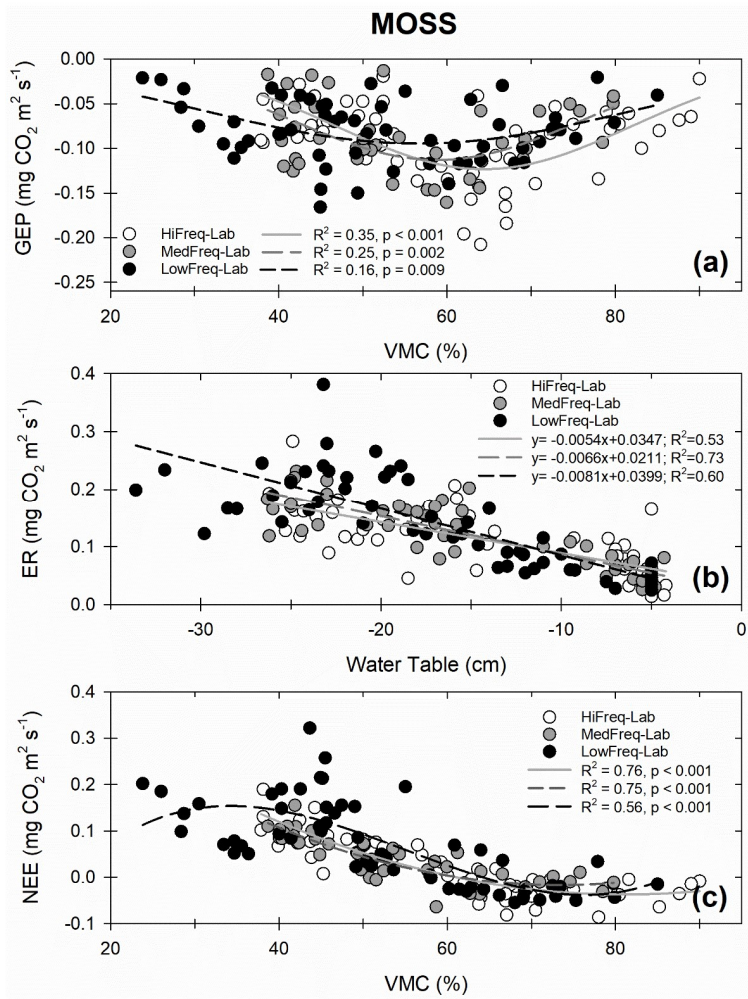

725

**Figure S7:** Hydrologic controls on  $\text{CO}_2$  exchange in *S. capillifolium*-dominated monoliths, depicting relationships in (a) GEP, (b) ER, and (c) NEE between rainfall frequency treatments. Relationships in (a) are unimodal with indicated correlation coefficients and significance. Relationships in (b) are linear and are indicated with correlation coefficients. All regressions in (b) were significant at  $p < 0.001$ . Relationships for HiFreq-Lab and MedFreq-Lab treatments in (c) are second-order polynomial; relationship for LowFreq-Lab is third-order polynomial with indicated correlation coefficients and significance.

730



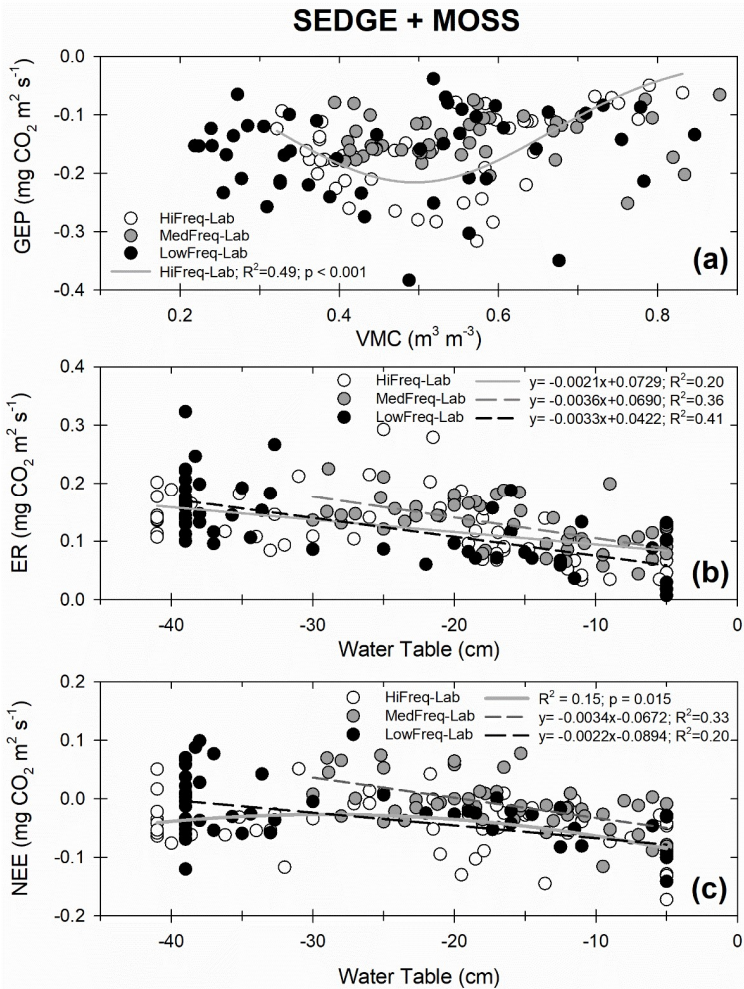

735 **Figure 68:** Hydrologic controls on  $\text{CO}_2$  exchange in *C. oligosperma*-dominated monoliths, depicting relationships in (a) GEP, (b) ER, and (c) NEE between rainfall frequency treatments. Relationship in (a) is unimodal with indicated correlation coefficients and significance. Relationships in (b) and (c) are linear and are indicated with correlation coefficients. All regressions in (b) and (c) were significant at  $p < 0.001$ .



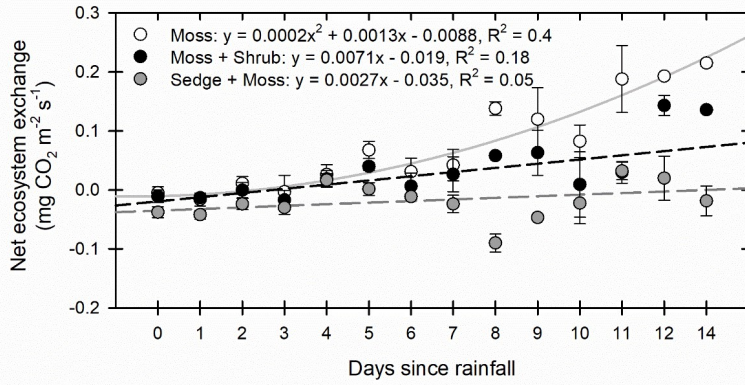

Figure 79: Relationships between NEE and number of consecutive dry days since rainfall for each vegetation community. Negative NEE represents CO<sub>2</sub> uptake. Error bars represent the standard deviation of the mean. Relationship for the Moss and Moss + Shrub communities are significant at  $p < 0.001$ ; significance for the Sedge + Moss communities is  $p = 0.045$ .
